# Supplementary material for: Wearable Technologies for Pediatric Patients with Surgical Infections—More than Counting Steps?
Source: MDPI journal article supplement (doi:10.3390/bios12080634), 2022-08-12

**Table S1.** Vital signs recording in study population by wearable device or conventional measurement

| ID  | Sex | Age | Diagnosis        | Total study time | Body temperature         |     |        |  |                           |     |    |  | Heart rate |         |  |  |                          |      |        |  | Oxygen saturation         |      |    |  |            |         |  |  |
|-----|-----|-----|------------------|------------------|--------------------------|-----|--------|--|---------------------------|-----|----|--|------------|---------|--|--|--------------------------|------|--------|--|---------------------------|------|----|--|------------|---------|--|--|
|     |     |     |                  |                  | Everion® wearable device |     |        |  | Conventional measurements |     |    |  | Difference |         |  |  | Everion® wearable device |      |        |  | Conventional measurements |      |    |  | Difference |         |  |  |
|     |     |     |                  |                  |                          |     |        |  |                           |     |    |  |            |         |  |  |                          |      |        |  |                           |      |    |  |            |         |  |  |
|     |     |     |                  |                  | mean                     | std | #      |  | mean                      | std | #  |  | Abs        | Rel (%) |  |  | mean                     | std  | #      |  | mean                      | std  | #  |  | Abs        | Rel (%) |  |  |
| 001 | m   | 14  | appendicitis     | 5d (128h)        | 35.7                     | 1.1 | 311236 |  | 36.5                      | 0.3 | 22 |  | -0.8       | -2.3    |  |  | 64.7                     | 14.8 | 311236 |  | 63.0                      | 7.5  | 12 |  | 1.7        | 2.7     |  |  |
| 002 | m   | 17  | appendicitis     | 2d (64h)         | 35.5                     | 0.9 | 215999 |  | 37.1                      | 0.4 | 33 |  | -1.6       | -4.4    |  |  | 77.3                     | 12.7 | 215999 |  | 74.4                      | 11.7 | 10 |  | 2.9        | 4.0     |  |  |
| 003 | m   | 13  | appendicitis     | 1d (43h)         | 34.9                     | 1.4 | 148722 |  | 36.8                      | 0.3 | 17 |  | -1.9       | -5.1    |  |  | 74.3                     | 16.6 | 148722 |  | 77.4                      | 6.1  | 7  |  | -3.2       | -4.1    |  |  |
| 004 | f   | 7   | osteomyelitis    | 2d (70h)         | 35.7                     | 0.9 | 228905 |  | 37.3                      | 0.6 | 30 |  | -1.6       | -4.3    |  |  | 94.2                     | 15.8 | 228905 |  | 108.0                     | 5.2  | 4  |  | -13.8      | -12.8   |  |  |
| 005 | m   | 8   | osteomyelitis    | 2d (69h)         | 35.5                     | 1.2 | 229670 |  | 36.9                      | 0.6 | 24 |  | -1.4       | -3.8    |  |  | 91.5                     | 15.1 | 229670 |  | 100.0                     | 6.2  | 3  |  | -8.5       | -8.5    |  |  |
| 006 | m   | 10  | appendicitis     | 5d (123h)        | 35.9                     | 1.2 | 367225 |  | 37.3                      | 0.3 | 26 |  | -1.4       | -3.8    |  |  | 72.4                     | 11.7 | 367225 |  | 69.6                      | 7.7  | 21 |  | 2.8        | 4.0     |  |  |
| 007 | m   | 8   | septic arthritis | 1d (43h)         | 35.0                     | 1.6 | 83089  |  | 37.6                      | 0.7 | 18 |  | -2.6       | -7.0    |  |  | 75.0                     | 13.7 | 83089  |  |                           |      |    |  | 0          |         |  |  |
| 008 | m   | 8   | appendicitis     | 1d (45h)         | 33.7                     | 2.0 | 29394  |  | 36.9                      | 0.3 | 17 |  | -3.2       | -8.7    |  |  | 93.5                     | 12.0 | 29394  |  | 106.5                     | 9.1  | 4  |  | -13.0      | -12.2   |  |  |
| 009 | m   | 10  | osteomyelitis    | 4d (119h)        | 35.0                     | 1.2 | 251609 |  | 37.1                      | 0.7 | 21 |  | -2.1       | -5.6    |  |  | 78.9                     | 15.0 | 251609 |  |                           |      |    |  | 0          |         |  |  |
| 010 | m   | 9   | appendicitis     | 0d (21h)         | 35.7                     | 0.8 | 73791  |  | 37.1                      | 0.4 | 8  |  | -1.4       | -3.7    |  |  | 83.5                     | 10.2 | 73791  |  |                           |      |    |  | 0          |         |  |  |
| 011 | m   | 7   | septic arthritis | 0d (10h)         | 35.2                     | 1.1 | 22042  |  | 36.8                      | 0.4 | 6  |  | -1.5       | -4.2    |  |  | 111.7                    | 13.6 | 22042  |  |                           |      |    |  | 0          |         |  |  |
| 012 | f   | 15  | appendicitis     | 1d (45h)         | 35.2                     | 1.5 | 158047 |  | 36.7                      | 0.2 | 10 |  | -1.5       | -4.2    |  |  | 68.5                     | 11.1 | 158047 |  | 74.0                      |      | 1  |  | -5.5       | -7.5    |  |  |
| 013 | f   | 4   | appendicitis     | 2d (67h)         | 34.5                     | 1.0 | 201450 |  | 37.1                      | 0.7 | 14 |  | -2.6       | -6.9    |  |  | 94.3                     | 18.4 | 201450 |  | 101.3                     | 15.0 | 6  |  | -7.1       | -7.0    |  |  |
| 014 | m   | 4   | septic arthritis | 1d (33h)         | 35.6                     | 1.0 | 70250  |  | 37.1                      | 0.5 | 20 |  | -1.5       | -4.0    |  |  | 104.5                    | 19.9 | 70250  |  | 115.0                     | 24.6 | 11 |  | -10.5      | -9.2    |  |  |
| 015 | f   | 11  | appendicitis     | 0d (18h)         | 36.4                     | 0.8 | 63936  |  | 36.7                      | 0.2 | 7  |  | -0.2       | -0.6    |  |  | 69.5                     | 9.1  | 63936  |  | 66.0                      |      | 1  |  | 3.5        | 5.3     |  |  |
| 016 | f   | 14  | appendicitis     | 0d (19h)         | 35.0                     | 1.4 | 67607  |  | 37.1                      | 0.8 | 15 |  | -2.0       | -5.5    |  |  | 72.3                     | 11.2 | 67607  |  | 92.3                      | 13.0 | 4  |  | -20.0      | -21.6   |  |  |
| 017 | m   | 7   | appendicitis     | 0d (17h)         | 35.3                     | 1.1 | 60474  |  | 37.0                      | 0.4 | 7  |  | -1.7       | -4.6    |  |  | 93.0                     | 16.1 | 60474  |  |                           |      |    |  | 0          |         |  |  |
| 019 | f   | 4   | osteomyelitis    | 0d (23h)         | 35.4                     | 0.6 | 29281  |  | 36.8                      | 0.4 | 6  |  | -1.4       | -3.8    |  |  | 111.5                    | 16.3 | 29281  |  | 80.0                      |      | 1  |  | 31.5       | 39.4    |  |  |

|      |   |    |              |          |      |     |        |      |     |    |      |      |       |      |        |       |      |    |     |     |      |     |       |      |     |      |      |      |  |  |  |      |      |
|------|---|----|--------------|----------|------|-----|--------|------|-----|----|------|------|-------|------|--------|-------|------|----|-----|-----|------|-----|-------|------|-----|------|------|------|--|--|--|------|------|
| 020  | m | 6  | appendicitis | 2d (55h) | 35.5 | 1.8 | 107073 | 37.7 | 0.7 | 38 | -2.2 | -5.8 | 113.8 | 17.7 | 107073 | 110.4 | 14.4 | 14 | 3.4 | 3.1 | 97.2 | 1.7 | 3288  | 98.7 | 0.7 | 9    | -1.4 | -1.4 |  |  |  |      |      |
| 021  | m | 15 | appendicitis | 0d (17h) | 35.4 | 0.9 | 61246  | 36.6 | 0.2 | 5  | -1.3 | -3.5 | 52.2  | 9.3  | 61246  |       |      | 0  |     |     | 97.1 | 1.4 | 44741 |      |     | 0    |      |      |  |  |  |      |      |
| Mean |   |    |              |          |      |     |        |      |     |    |      | -1.7 | -4.6  | Mean |        |       |      |    |     |     |      |     |       |      |     | -2.5 | -1.7 | Mean |  |  |  | -0.4 | -0.4 |
| STD  |   |    |              |          |      |     |        |      |     |    |      | 0.6  | 1.7   | STD  |        |       |      |    |     |     |      |     |       |      |     | 12.3 | 14.3 | STD  |  |  |  | 1.5  | 1.5  |

<sup>1</sup> Abbreviations: Abs, absolute; rel, relative; d, days; h, hours; f, female; m, male; STD (std), standard deviation

**Figure S1.** Everion® device, worn by a 3-year-old child.

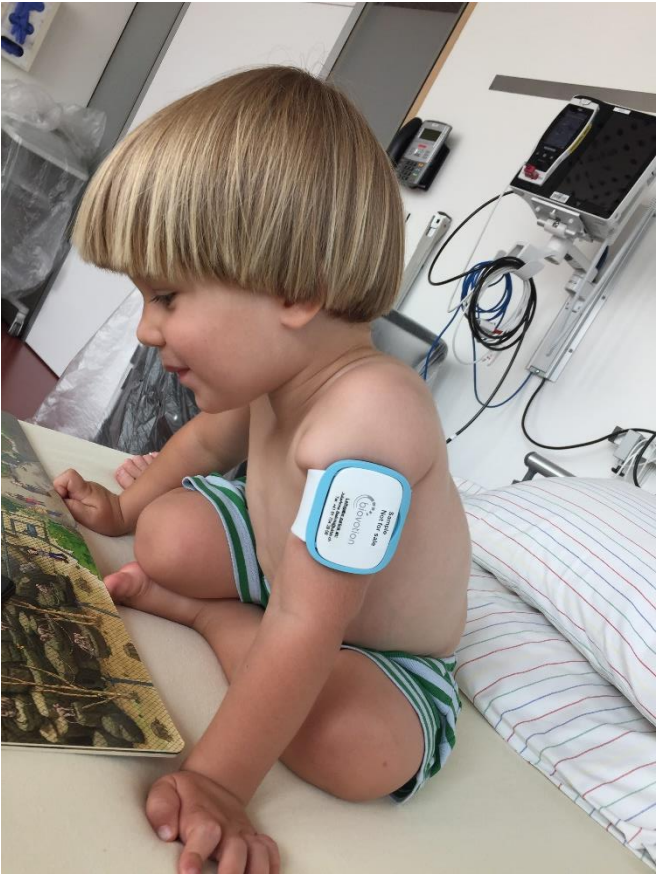

Supplement: s1 [file s1]
